# Supplementary material for: Predicting binding sites of hydrolase-inhibitor complexes by combining several methods
Source: BMC Bioinformatics. 2004 Dec 17;5:205. doi: 10.1186/1471-2105-5-205 (PMC544855; doi:10.1186/1471-2105-5-205)
Supplement: Additional File 4 — Comparison of individual methods for interface residue prediction for kallikrein(1hiaa). [file 1471-2105-5-205-S4.pdf]

| 10                        | 20    | 30            | 40     | 50              | 60 |
|---------------------------|-------|---------------|--------|-----------------|----|
| IIGGRECEKNSHPWQVAIYHYXSSF | CG    | GGVLVNPKWVLTA | HC     | KNDNYEVWLXGRHNL | FE |
|                           | P     |               | PP     |                 |    |
| CC CCCC                   | C     |               | CCCCC  |                 |    |
| S SSS                     | S     |               | SS S S |                 | S  |
|                           | TT TT |               | TT     |                 |    |
| E EEE                     | E     |               | EE E   |                 |    |
| 70                        | 80    |               |        |                 |    |
| NENTAQFFGVTADFPHPGFN      |       |               |        |                 |    |
|                           | C C   |               |        |                 |    |
| S S                       |       |               |        |                 |    |

Rows :

1. Phylogeny (P)
2. COC (C)
3. SVM (S)
4. Threading (T)
5. Consensus (E)

Protein: 1HIA\_A
