# Supplementary material for: Predicting binding sites of hydrolase-inhibitor complexes by combining several methods
Source: Springer Nature journal article supplement (doi:10.1186/1471-2105-5-205), 2004-12-17
Supplement: Additional file 5 [file 1471-2105-5-205-s5.pdf]

|                                                              |         |           |        |          |           |                         |
|--------------------------------------------------------------|---------|-----------|--------|----------|-----------|-------------------------|
|                                                              | 10      | 20        | 30     | 40       | 50        | 60                      |
| AQSV                                                         | VGV     | SQIKAPALH | SGYTG  | SNV      | VVAIDSGID | SSHPDLKVAGGASMPSETNPFQD |
| P                                                            | P       | PP        | P P    | P P      | P         | P                       |
| C                                                            |         | SS        | C C    | S S S    |           | SS                      |
| E                                                            |         | EE        | E E    | E E      |           | E                       |
|                                                              | 70      | 80        | 90     | 100      | 110       | 120                     |
| NNSHGTHVAGTVAALNNSIGVLGVAPSASLYAVKVLGADGSGQYSWIINGIEWAIANNMD |         |           |        |          |           |                         |
| P                                                            | P P     | P         | P      | PPP PP P | P         | P P                     |
| CC C                                                         |         | C C       | C      | C C CCCC | C C C     | CCC C                   |
| SS S                                                         | S S     |           | S S    | S S      | S S       |                         |
| T T                                                          |         |           | T      | TTTTTT   | T         |                         |
| EE E                                                         | E       | E         | E      | EE EEEE  | E E E     | E E                     |
|                                                              | 130     | 140       | 150    | 160      | 170       | 180                     |
| VINMSLGGPSGSAALKAADVAVASGVVVVAAAG                            | NE      | GTSGSS    | TVG    | YF       | GKYP      | SVIAVGAV                |
| PPPPP PP P P                                                 | P       | P         | P P    | PP       |           |                         |
| CCCC C                                                       | CCCC    | CC CCCC   | C C    | CCC      | CC        | C                       |
| SS                                                           |         |           | S SS   |          | SS        |                         |
| TTTTT                                                        | T       |           | T TTT  |          | T         |                         |
| EEEE E                                                       | EEE     | E         | E      | E EE     | EE        |                         |
|                                                              | 190     | 200       | 210    | 220      | 230       | 240                     |
| DSSNQRA                                                      | SF      | SSVGP     | ELDV   | M        | APG       | VSIQSTLPGNKYGA          |
| P                                                            | PP      | P         |        | P        | PPPPP     | P                       |
| CCCC                                                         | CC      | C         | C C    | CCC      | CCCCCCC   | C                       |
| S S                                                          | S       |           |        | S        | S         |                         |
|                                                              | TT      |           |        | T        | TT        |                         |
| E E                                                          | EE      | E         |        | E        | EEEEEE    | E                       |
|                                                              | 250     | 260       | 270    |          |           |                         |
| W                                                            | INTQVRS | SLENT     | TKLGDS | FY       | YKGLIN    | VQAAAQ                  |
| P                                                            | P P     | PP P P    | P      | P        |           |                         |
| C C                                                          |         | CC C C    |        |          |           |                         |
| S SS                                                         | S       | SS S      |        |          |           |                         |
| E EE                                                         |         | EE E      | EE E   |          |           |                         |

- Rows :
1. Phylogeny (P)
  2. COC (C)
  3. SVM (S)
  4. Threading (T)
  5. Consensus (E)

Protein: 2SIC\_E
