# Supplementary material for: Predicting binding sites of hydrolase-inhibitor complexes by combining several methods
Source: Springer Nature journal article supplement (doi:10.1186/1471-2105-5-205), 2004-12-17
Supplement: Additional file 6 [file 1471-2105-5-205-s6.pdf]

```

      10      20      30      40      50      60
ARSTNTFNHYATYHTLDEIYDFMDLLVAQHPELVSKLQIGRSYEGRP IYVLK FSTGGSNRP
      P      P      P
      C C  C C      P      C C C C  C C C C C C
      S
      E      E      E      E

      70      80      90      100     110     120
AIWIDLGIHSREWITQATGVWFVFAKKFTENYGNP SFTAILD SMDIFLEIVTNPNGFAFTH
      P PP
      C CC      C C      C
      S      S S
      T
      E EE      E

      130     140     150     160     170     180
SENRLWRKTRSVTSSSLCVGVDANRNWDAGFCKAGASSPCSETYHGKYANSEVEVKSLIV
      P      PP      PP
      C C C C      C      CC      C CCCC      C C
      S S      SS      S S SS      S
      T      T      TT
      E E E      E      EE      EEEE

      190     200     210     220     230     240
DFVKNHGNFKAFLSIHSYSQ LLLYPYGYTTQSI PDKTEL NQVAKSAVAALKSLYGT SYKY
      P PP      P
      C C C      CCCC C C      C CC      CCCC C CC
      S S      S      SS S S
      TT T
      E      E      EEEE E      E      E

      250     260     270     280     290     300
GSIITTIYQASGGSIDWSYNQCIKYSFTFELRDTGRYGFLLPASQIIPTAQETWLGVLTI
      P P P      P P      P PP
      CC CCCC      CCC C C C      CCC CC C C      C
      S      SSS      S S S      S S
      TTT      T      T
      E EEE E      EEE E      E      E EE E      E

      310
MEHTVNN

```

- Rows :
1. Phylogeny (P)
  2. COC (C)
  3. SVM (S)
  4. Threading (T)
  5. Consensus (E)

Protein: 4CPA
